# Supplementary material for: A Hepatitis B Virus-Derived Peptide Can Inhibit Infection of Human Lung Cells with SARS-CoV-2 in a Type-1 Interferon-Dependent Manner
Source: Viruses. 2021 Jun 25;13(7):1227. doi: 10.3390/v13071227 (PMC8310041; doi:10.3390/v13071227)

SUPPLEMENTARY LEGENDS

Figure S1.

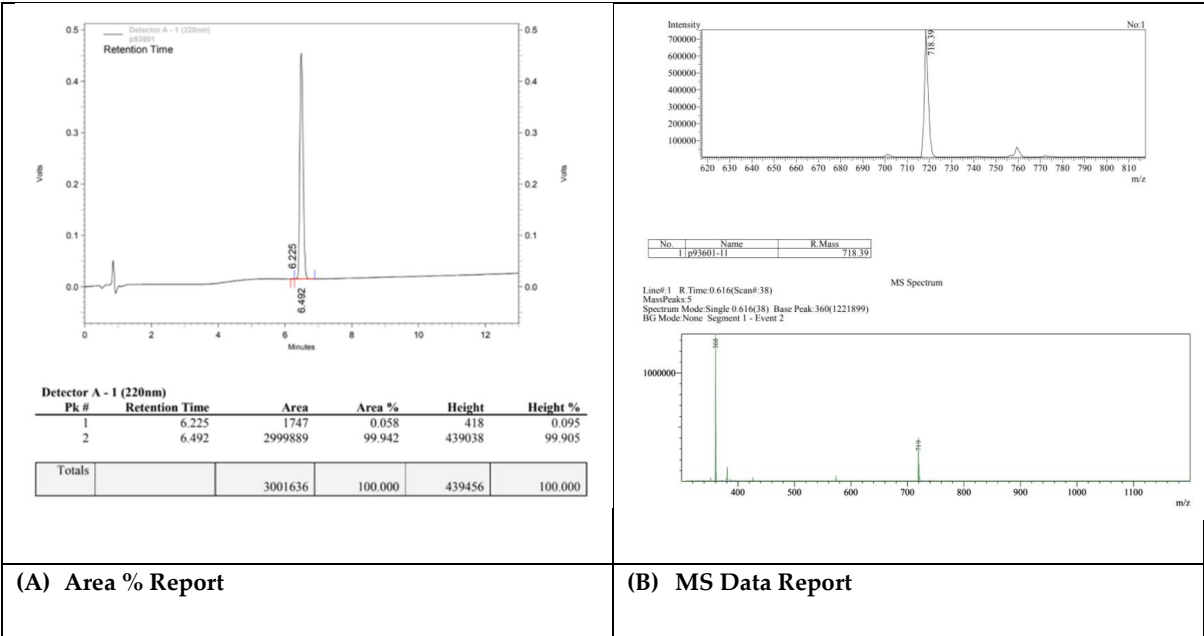

The Poly6 (GRLVFQ) peptide was synthesized by the Fmoc (9-fluorenylmethoxycarbonyl)-based solid-phase method. The area percent report and MS data report was performed.

Figure S2.

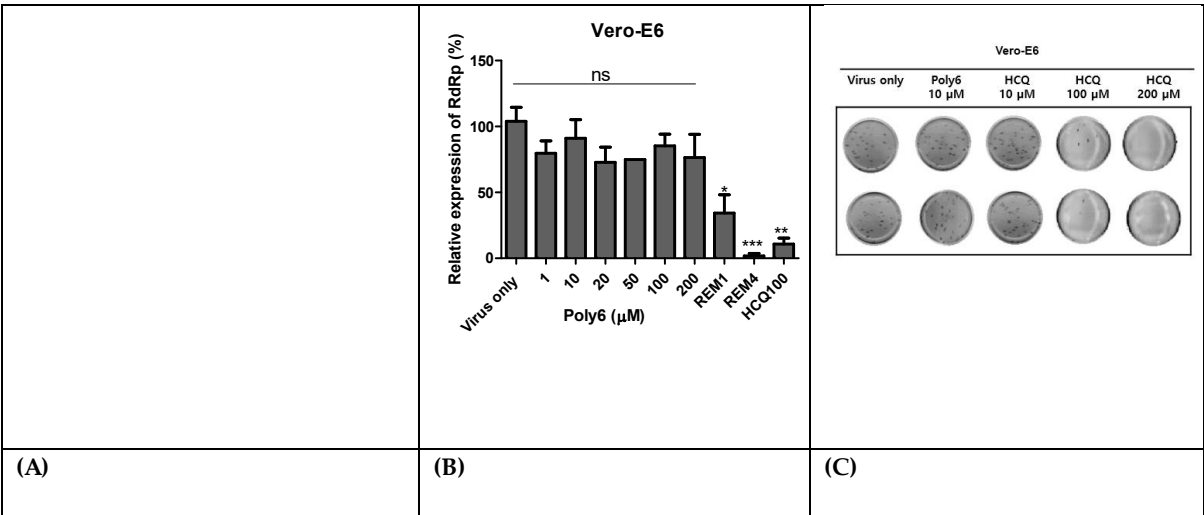

**Poly6 displayed limited ability to control SARS-CoV-2 in Vero E6 cells** (A) Vero-E6 cell viability subject to different doses of Poly6 treatment was measured by MTS assay. (B) SARS-CoV-2 viral load reduction assay in Vero-E6 cells. (C) SARS-CoV-2 plaque reduction assay in Vero-E6 cells. (D) Plaque assay of Poly6 on Calu-3 cells (Calu-3→Vero-E6 supernatant transfer). The experiments were performed in triplicate and repeated twice for confirmation. \*indicates  $p < 0.05$ , \*\*indicates  $p < 0.01$ , and \*\*\*indicates  $p < 0.001$ . The results are presented as mean values $\pm$ SD. Abbreviation: RDV, remdesivir.

HCQ, hydroxychloroquine sulfate.

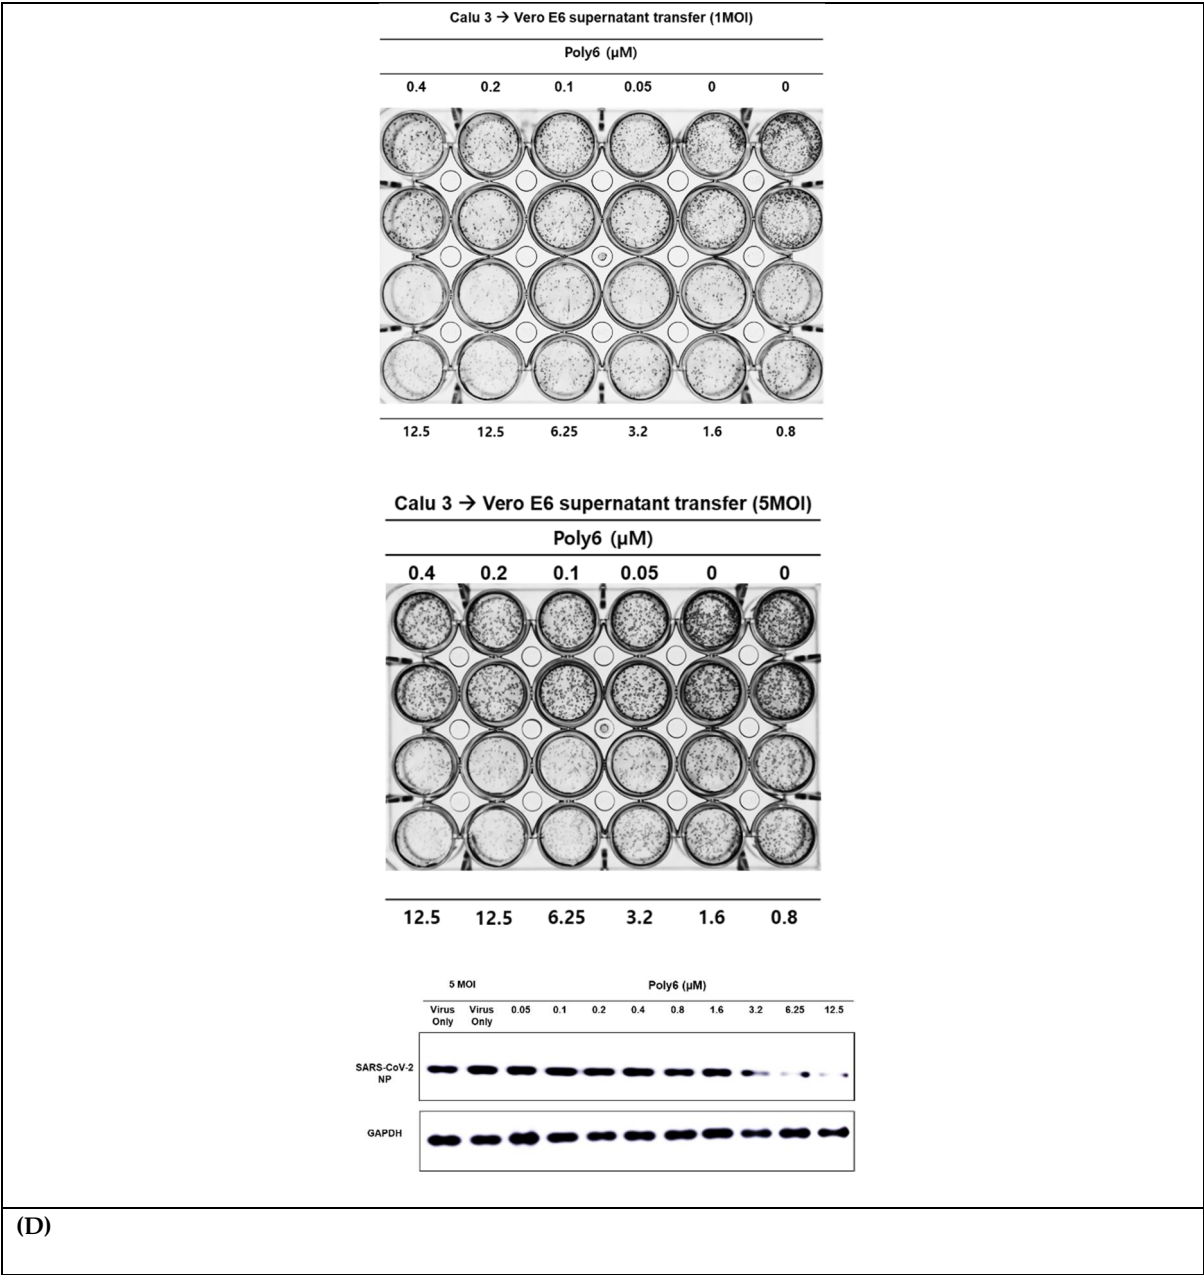

**Figure S3.**

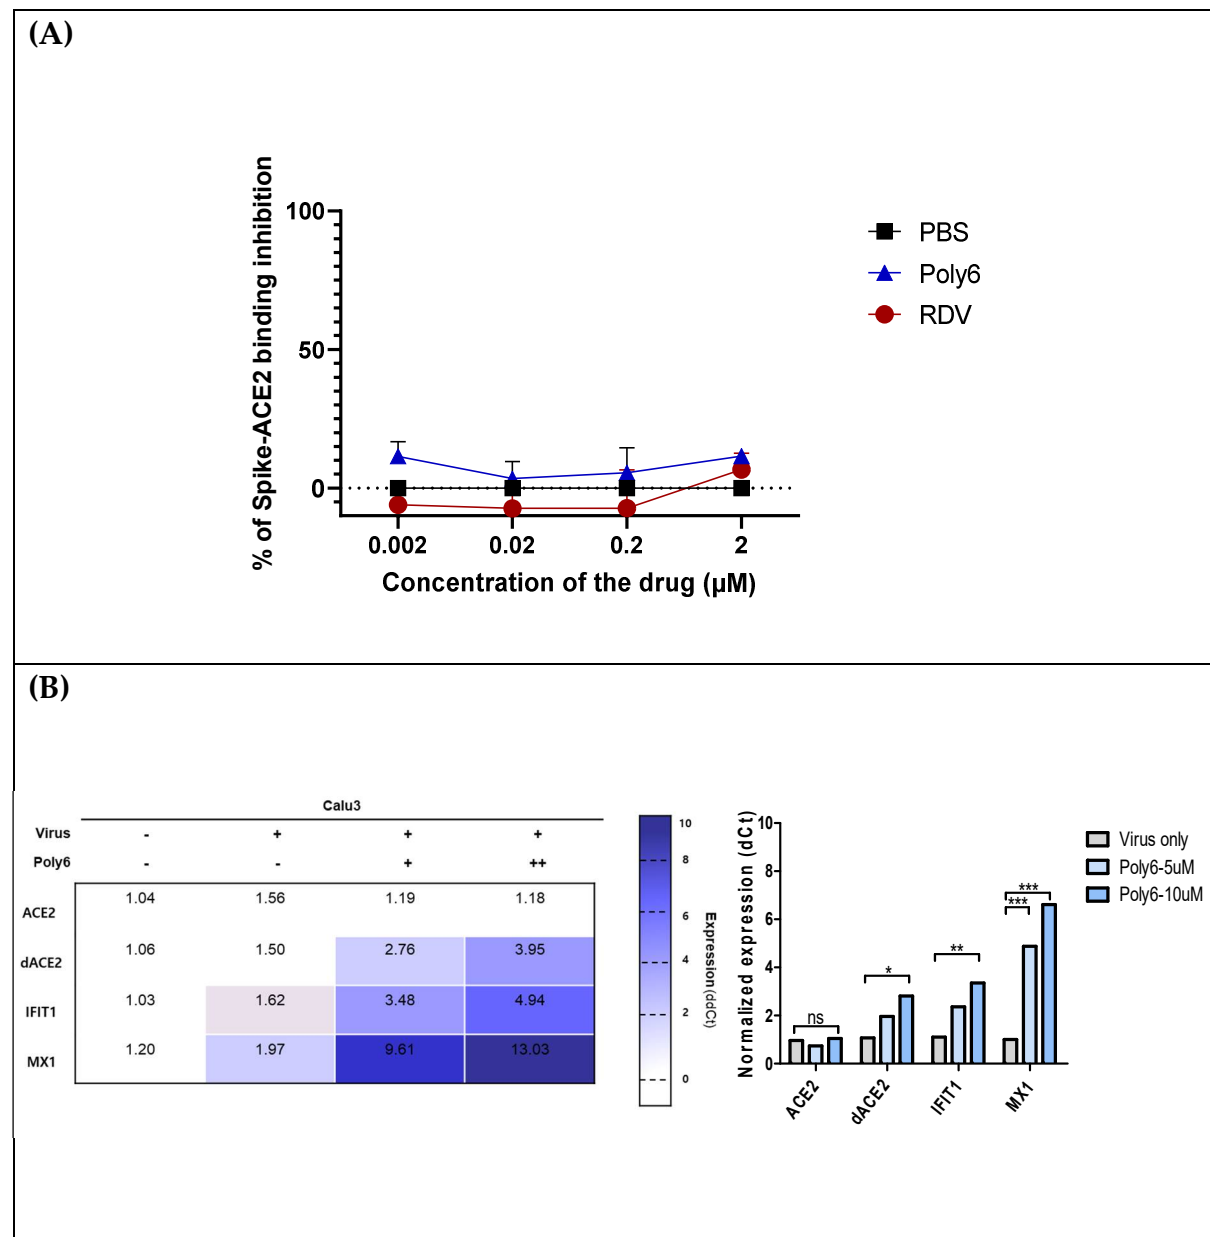

**Figure S4.**

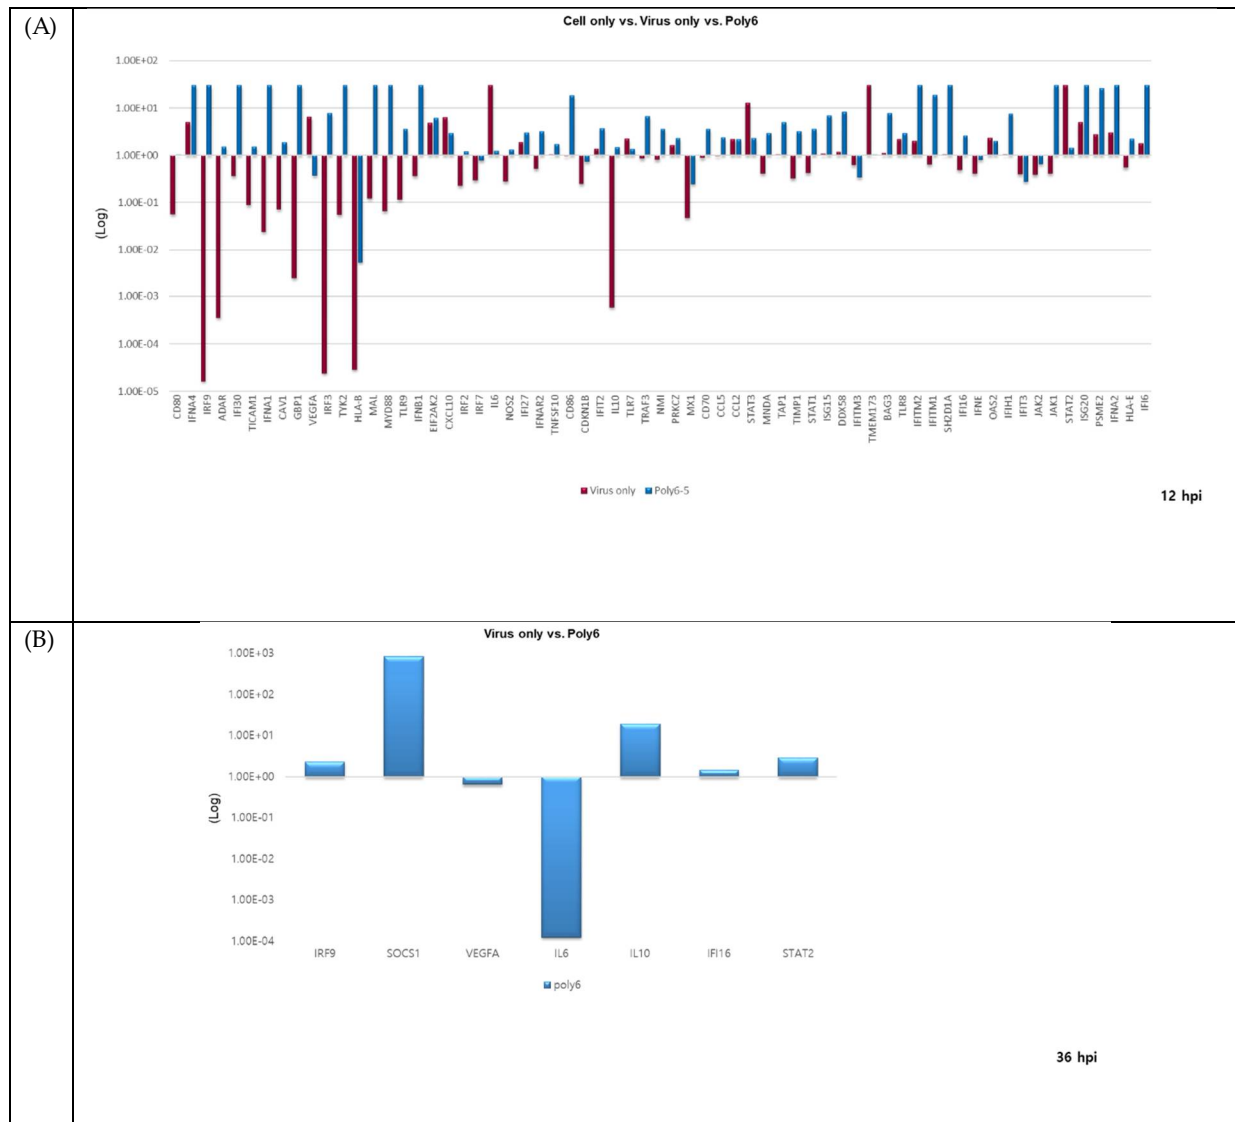

**mRNA expression profiles for IFN-I response genes encoding interferons/receptors in SARS-CoV-2 infected Calu-3 cells and following treatment of Poly6. (A)** mRNA expression profiles in SARS-CoV-2 infected cells and treatment of Poly6 (12hpi). Fold changes in Virus only or Poly6-treated group were normalized to Cell only group (B) mRNA expression profiles in SARS-CoV-2 infected cells and treatment of Poly6 (36hpi). Fold changes in the Poly6-treated group were normalized to Virus only group. The experiments were repeated twice for confirmation. The experiments were performed in duplicate and repeated twice for confirmation.

**Western blot whole blot data**

**Figure S5.**

SARS-CoV-2  
Spike (S1)

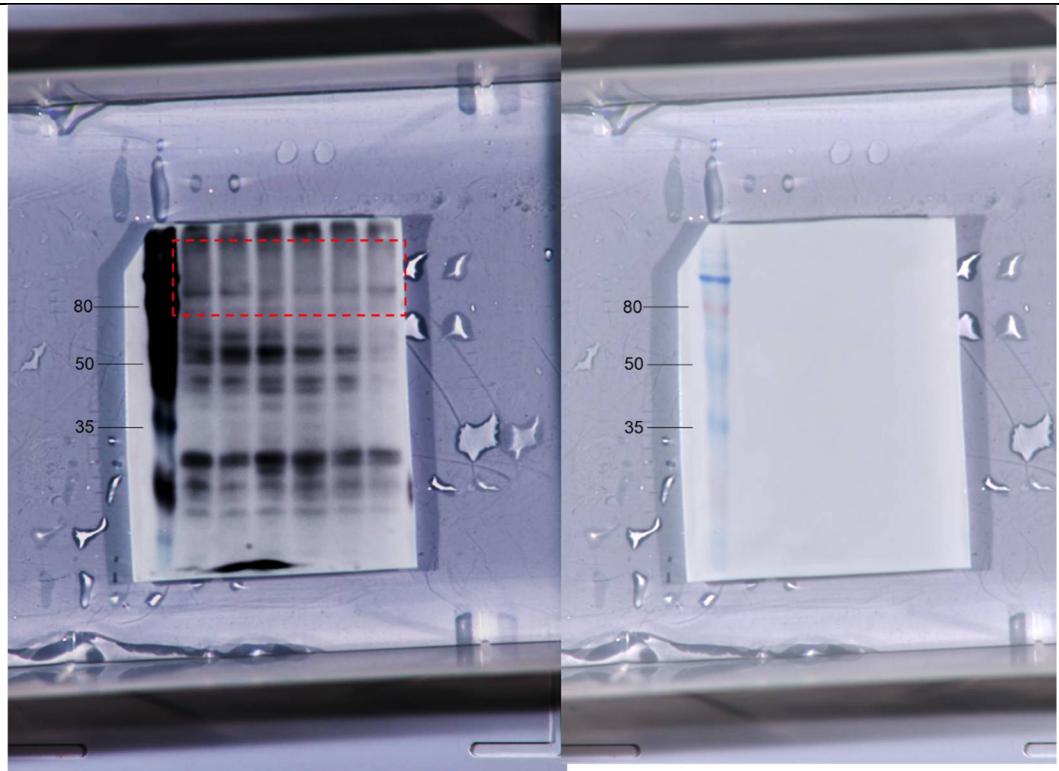

**Figure S6.**

SARS-CoV-2 NP

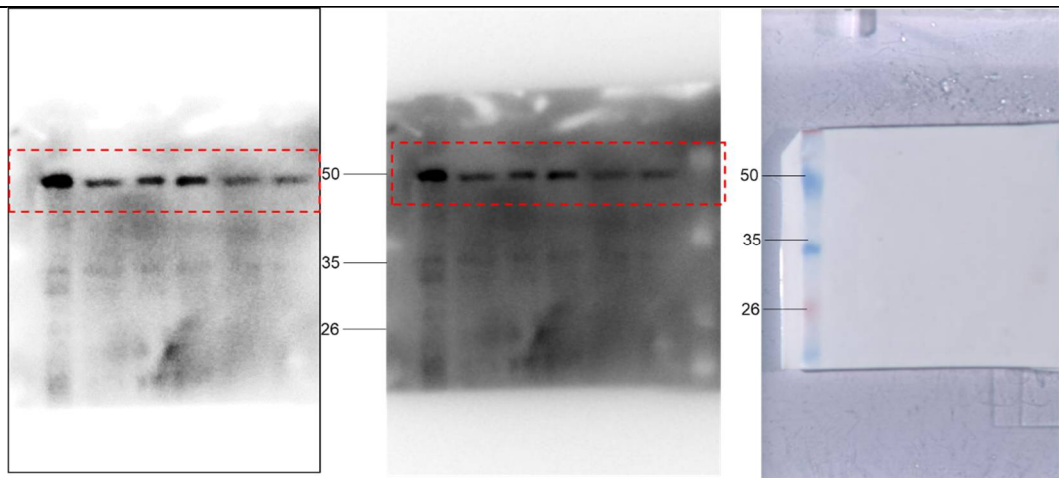

**Figure S7.**

GAPDH

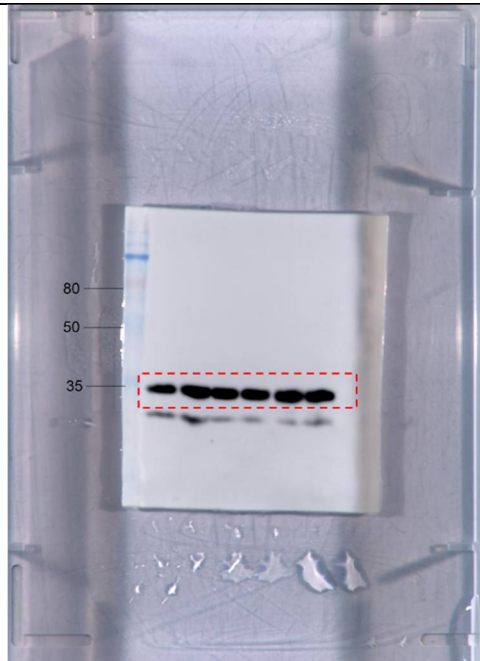

**Figure S8.**

IRF3

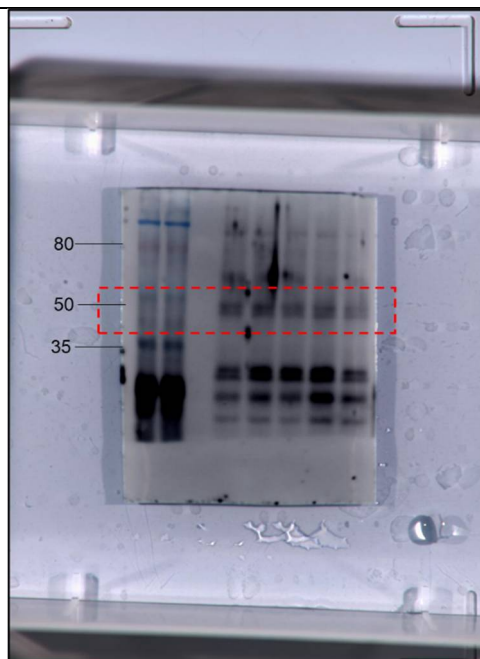

**Figure S9.**

p-IRF3

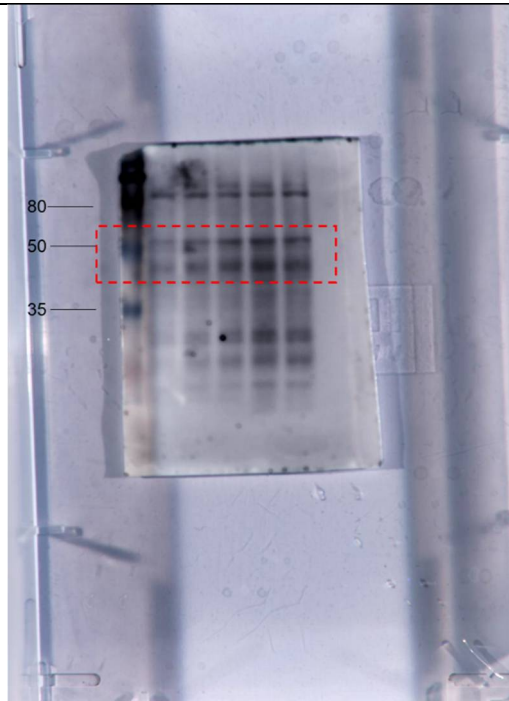

**Figure S10.**

STAT1

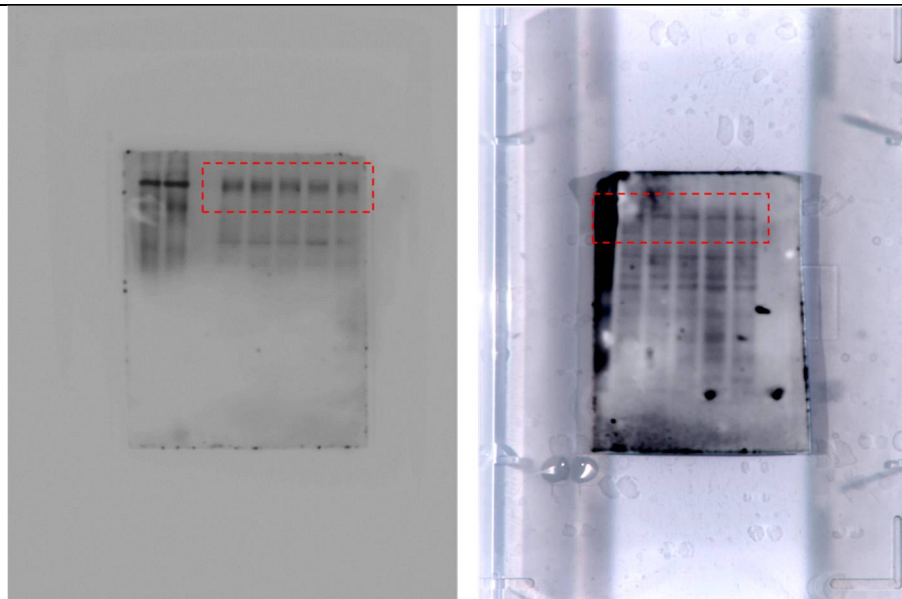

**Figure S11.**

p-STAT1

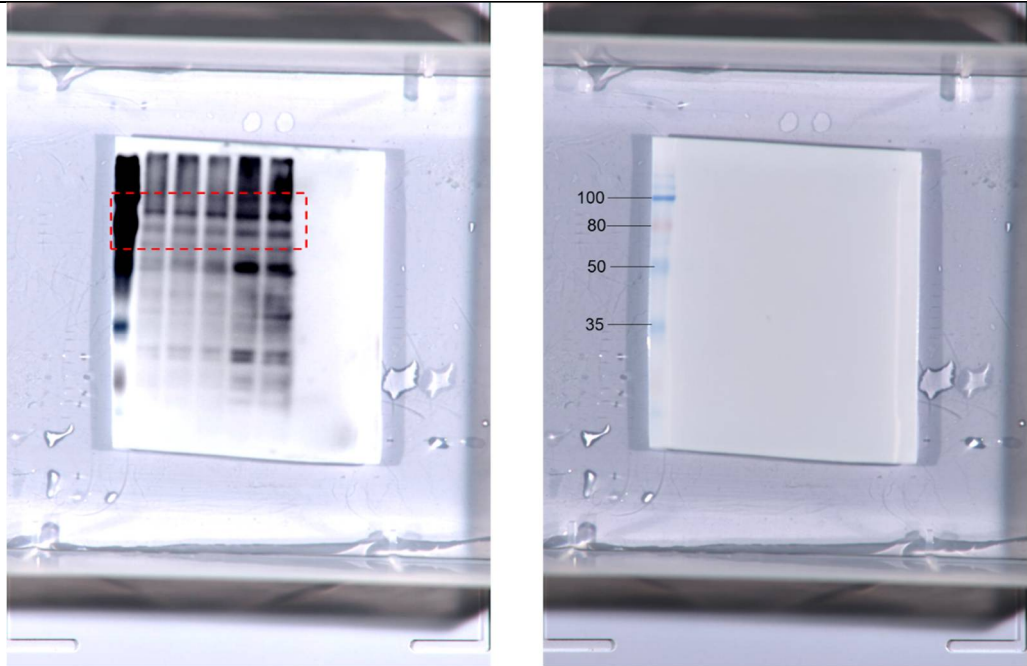

**Figure S12.**

SARS-CoV-2

NP

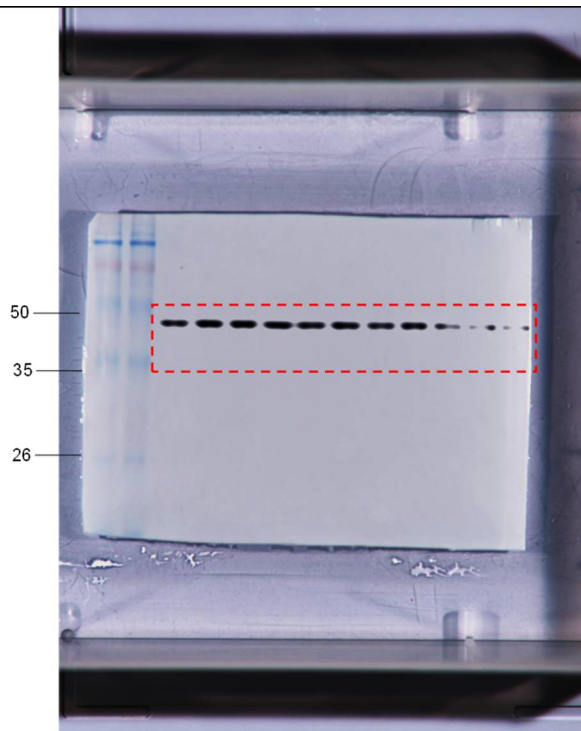

**Figure S13.**

GAPDH

50  
35  
26

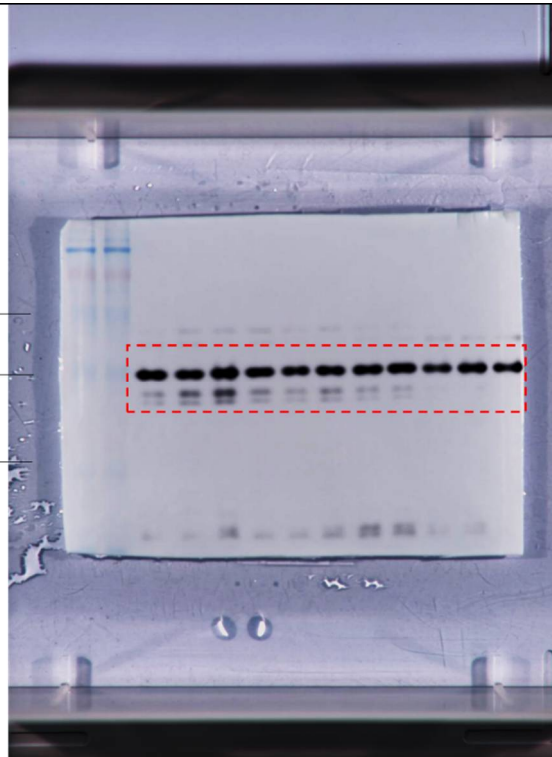

Supplement: Supplementary file 1 [file viruses-13-01227-s001.zip › viruses-1243991-supplementary.pdf]
